# Supplementary material for: Cas9-assisted biological containment of a genetically engineered human commensal bacterium and genetic elements
Source: Nat Commun. 2024 Mar 7;15:2096. doi: 10.1038/s41467-024-45893-w (PMC10920895; doi:10.1038/s41467-024-45893-w)
Supplement: Supplementary file 4 — Source Data [file 41467_2024_45893_MOESM4_ESM.xlsx]

## Sheet: Fig. 2
Figure. 2c	Bioluminescent signals with cis repression of each crRNA variant. The luminescence values were normalized to OD600 of the cell suspensions. (RLU/ OD600)
	WT	rpiL*	crRCN	crR7N	crR10N	crR12N
	0.700935	651888	1418.38	2691.22	15860.7	4566.56
	0.530504	744815	1274.71	2656.94	16062.3	4657.34
	1.06952	690559	1513.53	2889.97	17938.7	5380.28
Figure. 2f	Bioluminescent signals with trans activation of each taRNA variant. The luminescence values were normalized to OD600 of the cell suspensions. (RLU/ OD600)
	rpiL*-NS	crRCN-NS	crRCN-taRNA1	crRCN-taRNA2	crRCN-taRNA3	crRCN-taRNA4	crRCN-taRNA5	crRCN-taRNA6	crRCN-taRNA7
	651888	1418.38	8705.96	11722.9	9205.02	13974.4	16760.8	21473.9	2590.31
	744815	1274.71	9896.77	12036.7	9631.12	13796.7	14752.3	18719.5	2064.35
	690559	1513.53	11721.9	13625.8	12516	16036.7	16707.9	24586.8	2194.18
Figure. 2g	Correlation between outputs and free energy of folding for taRNA variants.
		taRNA1	taRNA2	taRNA3	taRNA4	taRNA5	taRNA6
	Free energy of taRNA (kcal/mol)	-32.04	-28.77	-31.21	-28.62	-24.78	-24.27
	Average of luminescence (RLU/ OD600)	10108.2	12461.8	10450.7	14602.6	16073.7	21593.4
Figure. 2h	ON/OFF outputs with PBT1311 and P1 promoters switched between crRNA and taRNA. (RLU/ OD600)
		No ER			ER-OFF			ER-ON
	P1/PBT1311	729838	797803	646681	1612.14	1395.48	1331.83	23481.1	22806.2	17993.4
	PBT1311/P1	579296	542526	536326	138.065	126.064	125.246	9646.38	10102.3	7204.49

## Sheet: Fig. 3
Figure. 3a	Growth curves of wild-type (WT) and thyA-deficient strains with PcfxA-sgRNA1 and PcepA-sgRNA1 in the presence (413 mM) and absence of thymidine. (OD600)
	Hour	WT, thymidine+, sgRNA1-			WT, thymidine-, sgRNA1-			thyA-, thymidine+, PcfxA			thyA-, thymidine+, PcepA			thyA-, thymidine-, PcepA
	0	0.0205	0.026	0.0185	0.019	0.0235	0.0185	0.0015	0.021	0.02	0.0225	0.0275	0.0195	0.022	0.03	0.0205
	1	0.0505	0.061	0.0335	0.0475	0.061	0.0375	0.0095	0.0325	0.04	0.0495	0.0485	0.042	0.0475	0.048	0.0445
	2	0.087	0.097	0.062	0.082	0.0985	0.0595	0.0155	0.0415	0.057	0.0775	0.07	0.065	0.0775	0.069	0.0705
	3	0.138	0.17	0.0885	0.11	0.1805	0.086	0.0085	0.056	0.0815	0.1075	0.1095	0.101	0.0955	0.1085	0.098
	4	0.2665	0.2325	0.1685	0.1875	0.2735	0.15	0.03	0.0675	0.1525	0.1915	0.151	0.1785	0.1565	0.1395	0.1555
	5	0.504	0.4135	0.3195	0.296	0.47	0.245	0.046	0.0975	0.2525	0.3405	0.267	0.3075	0.1915	0.1755	0.2045
	6	1.2925	0.6825	0.5945	0.516	0.8425	0.4965	0.071	0.146	0.4605	0.5745	0.4905	0.5395	0.229	0.2065	0.268
	7	1.695	1.05	1.0825	1.15	1.2675	0.9475	0.115	0.2155	0.661	1	0.72	0.91	0.2735	0.2465	0.3005
	8	1.91	1.4	1.37	1.6025	1.5175	1.375	0.187	0.316	1.0425	1.355	0.96	1.15	0.302	0.2645	0.324
	9	2.25	1.6	1.58	1.8425	1.6075	1.6375	0.3075	0.5275	1.295	1.7	1.3425	1.4625	0.294	0.2355	0.331
	10	2.135	1.7925	1.6775	1.84	1.7	1.755	0.387	0.637	1.355	1.69	1.54	1.565	0.2715	0.251	0.357
	24	1.7	1.585	1.405	1.4525	1.31	1.48	1.065	0.92	1.07	1.5875	1.55	1.385	0.0735	0.081	0.11
Figure. 3b	Cell viability of WT and thyA-deficient strain with PcepA-sgRNA1 in the presence (413 mM) and absence of thymidine under anaerobic and aerobic conditions. (CFU/ml)
	Day	WT, thymidine+, sgRNA1-, O2-			WT, thymidine-, sgRNA1-, O2-			WT, thymidine-, sgRNA1-, O2+			thyA-, thymidine+, PcepA, O2-			thyA-, thymidine-, PcepA, O2-			thyA-, thymidine-, PcepA, O2+
	0	830000000	1100000000	580000000	520000000	570000000	970000000	930000000	570000000	500000000	160000000	160000000	110000000	120000000	97000000	93000000	130000000	110000000	110000000
	0.33	8700000000	11000000000	7300000000	7000000000	4100000000	11000000000	1100000000	700000000	380000000	2700000000	2400000000	2000000000	310000	1900000	1900000	110000000	43000000	93000000
	1	1800000000	2200000000	1100000000	1100000000	1200000000	1800000000	150000000	130000000	57000000	1700000000	1800000000	1100000000	97000	22000	10000	4500000	5700000	9000000
	2	97000000	160000000	57000000	73000000	77000000	44000000	27000000	20000000	16000000	23000000	33000000	18000000	3700	1300	570	400000	830000	310000
	3	63000000	120000000	33000000	80000000	67000000	37000000	12000000	7700000	5500000	11000000	14000000	7700000	900	310	140	170000	120000	43000
	4	33000000	83000000	21000000	45000000	46000000	33000000	27000000	26000000	24000000	9700000	7300000	2500000	350	160	46	18000	13000	8000
	5	7000000	18000000	7300000	23000000	23000000	18000000	1100000	770000	380000	3000000	2100000	1100000	190	63	28	4500	3900	2600
	6	3100000	8700000	2200000	4800000	12000000	9000000	220000	220000	120000	700000	670000	770000	34	27	6	950	930	590
	8	770000	2900000	900000	2400000	3400000	2000000	42000	28000	11000	130000	120000	77000	8	N.D.	1	74	66	37
	11	210000	420000	140000	330000	1200000	280000	1500	870	470	37000	27000	37000	4	N.D.	N.D.	8	2	2
																	N.D. represents no detection.
Figure. 3d	Cell viability of WT and thyA-deficient strain with PcepA-sgRNA1 when cells were transferred from aerobic to anaerobic conditions in the absence of thymidine. (CFU/ml)
	Day	WT, thymidine-, sgRNA1-			thyA-, thymidine-, PcepA
	0	770000000	930000000	490000000	120000000	100000000	120000000
	0.33	310000000	490000000	390000000	90000000	83000000	60000000
	1	110000000	77000000	49000000	4200000	9300000	3300000
	2	26000000	17000000	17000000	280000	730000	180000
	3	12000000	10000000	9700000	130000	100000	41000
	4	1400000000	1100000000	1600000000	770	1100	330
	5	1400000000	1400000000	1200000000	20	30	10
	6	120000000	160000000	220000000	1	3	N.D.
	8	100000000	73000000	110000000	N.D.	N.D.	N.D.
	11	12000000	24000000	63000000	N.D.	N.D.	N.D.
					N.D. represents no detection.
Figure. 3e	Cell viability of thyA-deficient strain with PcepA-sgRNA1 at various concentrations of thymidine in the anaerobic condition. (CFU/ml)
	Day	Thymidine concentration
		413μM			10μM			5μM			0μM
	0	53000000	53000000	67000000	83000000	49000000	77000000	97000000	77000000	44000000	53000000	33000000	48000000
	1	570000000	530000000	630000000	26000000	15000000	22000000	1200000	380000	870000	29000	4300	11000
Figure. 3f	Cell viability of the thyA-deficient strain with PcepA-sgRNA1 at various concentration of thymidine in the aerobic condition. (CFU/ml)
	Day	Thymidine concentration
		413μM			10μM			5μM			0μM
	0	53000000	53000000	67000000	83000000	49000000	77000000	97000000	77000000	44000000	53000000	33000000	48000000
	4	1900000	1300000	1600000	1700000	620000	2000000	1500000	2200000	1600000	2100000	770000	1700000

## Sheet: Fig. 4
Figure. 4b	Viable B. thetaiotaomicron cells following conjugation on TYG agar plates without thymidine and plating on BHIS agar plates with gentamicin, thymidine, and erythromycin. (CFU/ml)
		No donor cells			Plasmid bearing mutated thyA gene			Plasmid bearing thyA gene
	ER-, SpCas9+, sgRNA-	N.D.	N.D.	N.D.	169	553	720	33	1498	267
	ER+, SpCas9+, sgRNA-	N.D.	N.D.	N.D.	440	334	598	375	1842	452
	ER+, SpCas9+, NT	N.D.	N.D.	N.D.	277	1143	692	1707	1902	959
	ER+, SpCas9+, sgRNA1	N.D.	N.D.	N.D.	1850	99	121	N.D.	N.D.	N.D.
								N.D. represents no detection.
Figure. 4c	Conjugation efficiency of thyA gene through conjugation on TYG agar plates containing thymidine. (log10)
	NT			sgRNA1
	-5.5	-6.7	-6.2	-7.8	-8.7	-8.3
Figure. 4e	Cell viability of Bacteroides before and after conjugation between the E. coli and genetically engineered thymidine-auxotrophic B. thetaiotaomicron with various types of sgRNAs. (CFU/ml)
		Before conjugation			After conjugation
	NT, at CD site	3000000000	3200000000	2200000000	1600000000	3000000000	2800000000
	sgRNA1, at CD site	2400000000	2800000000	3400000000	1400000000	2200000000	2600000000
	NT, at attBT2 site	2800000000	2600000000	3000000000	1400000000	3200000000	2600000000
	sgRNA1, at attBT2 site	2800000000	2600000000	3000000000	2200000000	1800000000	2600000000
	sgRNA12, at attBT2 site	1800000000	2800000000	3200000000	1800000000	2000000000	2600000000
	sgRNA13, at attBT2 site	3000000000	2800000000	3200000000	1600000000	3000000000	2400000000
	sgRNA15, at attBT2 site	3800000000	2600000000	3400000000	2000000000	3400000000	3200000000
	sgRNA16, at attBT2 site	1400000000	2400000000	2800000000	2400000000	2200000000	2800000000
	sgRNA20, at attBT2 site	2400000000	3000000000	3600000000	1600000000	3000000000	2200000000
Figure. 4f	Viable B. thetaiotaomicron when cells were plated on TYG agar plates without thymidine after conjugation on TYG agar plates with thymidine. (CFU/ml)
	NT, at CD site	3408	3196	2532
	sgRNA1, at CD site	N.D.	N.D.	N.D.
	NT, at attBT2 site	3636	3444	2676
	sgRNA1, at attBT2 site	N.D.	N.D.	N.D.
	sgRNA12, at attBT2 site	N.D.	N.D.	N.D.
	sgRNA13, at attBT2 site	N.D.	N.D.	N.D.
	sgRNA15, at attBT2 site	N.D.	N.D.	N.D.
	sgRNA16, at attBT2 site	N.D.	N.D.	N.D.
	sgRNA20, at attBT2 site	N.D.	N.D.	N.D.
			N.D. represents no detection.

## Sheet: Fig. 5
Figure. 5b	Viable B. thetaiotaomicron when cells were plated on BHIS agar plates with gentamicin, thymidine, and erythromycin after conjugation on TYG agar plates without thymidine. (CFU/ml)
	Donor-, Promoter-, sgRNA-	N.D.	N.D.	N.D.
	Donor+, Promoter-, sgRNA-	175	658	650
	Donor+, PcepA, NT	118	553	660
	Donor+, PcepA, sgRNA1	7	21	56
	Donor+, PcfxA, sgRNA1	11	10	11
		N.D. represents no detection.
Figure. 5d	Amplicon patterns of three transconjugants isolated from TYG agar plates with thymidine and erythromycin after conjugation. PCR was performed with primers named Seq-thyA-F and mmD663 in Supplementary Table 6.
Figure. 5e	PCR amplification of EmR gene fragment (144 bp) in transconjugants with primers named qPCR-EmR-F and qPCR-EmR-R in Supplementary Table 6.

## Sheet: Fig. 6
Figure. 6a	Outputs of NanoLuc measured every 7 days until day21. (RLU/OD600)
	Day	0	12773.9	11264.2	10105.9	11011.9	9760	10609.3
		7	9669.38	9758.65	9732.44	8844.76	9004.07	9644.91
		14	10537	10640.2	10735.1	9351.87	9074.39	9243.18
		21	9850	10312.6	10537.6	10051.9	9893.62	10616.4
Figure. 6b	Viable B. thetaiotaomicron when cells were plated on BHIS agar plates with thymidine, erythromycin, and gentamicin every 7 days until day21 after conjugation on TYG agar plates without thymidine. (CFU/ml)
			No donor cells		Plasmid bearing mutated thyA gene						Plasmid bearing thyA gene
	Day	0	N.D.	N.D.	400	220	70	30	290	30	N.D.	N.D.	N.D.	N.D.	N.D.	N.D.
		7	N.D.	N.D.	1800	280	500	840	1700	930	N.D.	N.D.	N.D.	N.D.	N.D.	N.D.
		14	N.D.	N.D.	390	270	38	2000	1900	1900	N.D.	N.D.	N.D.	N.D.	N.D.	N.D.
		21	N.D.	N.D.	1100	2100	1900	1200	1500	1200	6	N.D.	N.D.	36	N.D.	4
														N.D. represents no detection.

## Sheet: Fig. 7
Figure. 7b	Outputs of NanoLuc in feces of mice (gavaged with B. thetaiotaomicron strains as indicated) measured until day 10. (RLU/mg Stool)
	Day	Non-treat				thyA+ (ER-/CD-)				DthyA (ER+/CD+)				DthyA (ER+/CDNT)				DthyA (ER+/CD+) with thyA+ (ER-/CD-)
	1	30.77	30.77	30.77	23.08	N.D.	19.05	15.38	N.D.	23.08	34.78	42.11	30.77	46.15	24	27.27	30.77	15.38	19.05	15.38	N.D.
	2	25	9.52	10	10	15.38	15.38	38.46	15.38	336.36	52.63	38.46	138.46	208.7	330.43	58.82	1176.92	17.39	30.77	23.08	25
	3	26.67	23.08	30	10	7.69	15.38	23.08	15.38	1192.31	1160	740	108.33	2495.24	2345.45	31.58	886.96	23.08	15.38	23.08	28.57
	4	21.05	31.58	23.53	70.59	19.05	61.54	21.05	30.77	988.89	923.81	2685.71	166.67	2494.74	1988.24	1053.85	3784.62	20	15.38	16	15.38
	5	25	30	35.29	21.05	16.67	23.08	21.05	34.78	1184.62	792.31	2218.18	1600	1453.33	539.13	1345.45	625	25	20	23.08	30.77
	6	23.08	23.08	26.09	19.05	30.77	26.09	15.38	15.38	1083.33	1069.23	960	1823.08	476.19	447.62	2161.54	1072.73	17.39	23.08	69.23	27.27
	7	33.33	15.38	30	31.58	33.33	33.33	38.46	33.33	1234.78	672	1830.77	1643.48	792.31	546.15	407.69	481.82	53.33	30	27.27	33.33
	8	23.08	20	23.08	20	25	18.18	33.33	23.08	3852.17	1728	1692.31	700	1076.19	1216.67	807.69	878.26	38.1	24	23.08	16
	9	23.08	30	38.1	23.08	37.5	34.78	38.46	47.62	3304	775	1015.38	1730.77	545.45	746.15	3104.76	1053.85	32	23.08	30.77	40
	10	N.D.	N.D.	9.6	26.67	21.82	80	8.28	12	1123.2	1991.11	1230	1430.77	650	2325.52	3787.83	1660.8	8	12.63	10	10.91
																			N.D. represents no detection.
Figure. 7c	Viable B. thetaiotaomicron when fecal suspensions from mice gavaged with indicated strains without thyA+ (ER-/CD-) strain were plated on selective agar plates. (CFU/mg Stool)
		DthyA (ER+/CD+)				DthyA (ER+/CDNT)
	Thymidine+	4900000	31000	3000000	1800000	2500000	11000000	190000	5100000
	Thymidine-	N.D.	N.D.	N.D.	N.D.	N.D.	N.D.	N.D.	N.D.
	Detection limit	0.053	0.063	0.07	0.055	0.068	0.057	0.07	0.088
							N.D. represents no detection.
Figure. 7e	Viable B. thetaiotaomicron and E. coli when fecal pellets collected from mice gavaged with indicated strains on Day 7 and Day 14 were plated on selective agar plates and incubated in aerobic or anaerobic condition. (CFU/mg Stool)
		LB (Aerobic)				TYG agar plate w/ gentamicin and thymidine (Anaerobic)				TYG agar plate w/ gentamicin (Anaerobic)				Detection limit
	ΔthyA (ER+/CD+) at day7	1440000	1490000	1250000	1690000	335000	209000	257000	371000	N.D.	N.D.	N.D.	N.D.	14.4	8.96	11	10.1
	ΔthyA (ER+/CDNT) at day7	1510000	768000	456000	462000	22600000	42700000	39400000	36500000	55300000	51200000	60100000	68100000		N.D. represents no detection.
	ΔthyA (ER+/CD+) at day14	169000	58400	105000	363000	14300000	15900000	8910000	24100000	13000000	19600000	17300000	23400000
	ΔthyA (ER+/CDNT) at day14	134000	112000	126000	228000	22000000	9860000	16500000	37200000	18700000	10300000	22400000	34100000

## Sheet: Supplementary Fig. 2
Supplementary Figure. 2b	PCR identification of the integration of the gene cassette.
Supplementary Figure. 2c	PCR identification of the integration of sgRNA.

## Sheet: Supplementary Fig. 3
Supplementary Fig. 3b	Correlation between Minimum Free Energy (MRE), i.e., free energy of ER complex, and bioluminescent signal of each crRNA (crRCN)/taRNA complex.
		taRNA1	taRNA2	taRNA3	taRNA4	taRNA5	taRNA6
	Free energy of ER complex (kcal/mol)	-82.68	-82.68	-76.68	-83.68	-84.48	-77.28
	Average of luminescence (RLU/ OD600)	10108.2	12461.8	10450.7	14602.6	16073.7	21593.4

## Sheet: Supplementary Fig. 4
Supplementary Fig. 4	Cell viability of WT strain and genetically modified strain with and without PcepA-sgRNA1, cultured anaerobically in the presence or absence of thymidine. (CFU/ml)
	Day	thyA+, ER-, SpCas9-, sgRNA-, thymidine+			thyA+, ER-, SpCas9-, sgRNA-, thymidine-			thyA-, ER+, SpCas9+, sgRNA-, thymidine+			thyA-, ER+, SpCas9+, sgRNA-, thymidine-			thyA-, ER+, SpCas9+, Pcep-sgRNA1, thymidine+			thyA-, ER+, SpCas9+, Pcep-sgRNA1, thymidine-
	0	630000000	930000000	670000000	530000000	1200000000	900000000	270000000	170000000	230000000	150000000	130000000	170000000	120000000	130000000	180000000	100000000	110000000	100000000
	1	2400000000	1900000000	2300000000	1300000000	1900000000	1900000000	1500000000	1900000000	970000000	360000	45000	21000	1600000000	2000000000	1100000000	11000	19000	4800
	2	120000000	270000000	190000000	97000000	200000000	250000000	17000000	32000000	17000000	87000	3000	32000	42000000	25000000	47000000	700	710	400
	3	150000000	170000000	160000000	120000000	130000000	170000000	14000000	16000000	17000000	45000	1400	6500	22000000	19000000	19000000	200	230	60
	4	47000000	40000000	130000000	73000000	46000000	100000000	15000000	12000000	13000000	25000	720	5500	12000000	5400000	13000000	58	45	30
	5	15000000	23000000	23000000	33000000	30000000	32000000	5300000	11000000	11000000	12000	410	5700	7700000	3400000	7700000	36	42	17
	6	12000000	21000000	35000000	24000000	21000000	32000000	16000000	14000000	23000000	11000	420	6300	2300000	2100000	2700000	9	13	7

## Sheet: Supplementary Fig. 5
Supplementary Fig. 5a	Growth curves of thyA-deficient strain with PcepA-sgRNA1 in defined minimal medium (DMM) with different carbon sources with or without thymidine. (OD600)
	Hour	0.5% glucose, thymidine-			0.5% glucose, thymidine+			0.5% galactose, thymidine-			0.5% galactose, thymidine+			0.3% maltose, thymidine-			0.3% maltose, thymidine+			0.5% starch, thymidine-			0.5% starch, thymidine+
	1	0.101	0.111	0.128	0.101	0.102	0.112	0.095	0.1	0.098	0.094	0.099	0.091	0.096	0.098	0.1	0.094	0.101	0.121	0.11	0.101	0.108	0.103	0.105	0.111
	2	0.11	0.101	0.121	0.106	0.118	0.121	0.1	0.098	0.112	0.103	0.109	0.105	0.101	0.103	0.098	0.101	0.102	0.109	0.113	0.121	0.109	0.115	0.118	0.106
	4	0.148	0.155	0.143	0.141	0.139	0.142	0.116	0.109	0.111	0.121	0.119	0.128	0.125	0.123	0.111	0.124	0.122	0.134	0.109	0.108	0.121	0.113	0.118	0.121
	6	0.174	0.181	0.177	0.189	0.192	0.2	0.143	0.123	0.128	0.156	0.167	0.159	0.155	0.165	0.156	0.172	0.182	0.192	0.11	0.108	0.113	0.106	0.102	0.12
	8	0.252	0.276	0.231	0.447	0.498	0.511	0.2	0.198	0.211	0.283	0.298	0.287	0.189	0.19	0.182	0.288	0.3	0.298	0.085	0.108	0.117	0.084	0.095	0.108
	10	0.263	0.244	0.211	0.847	0.865	0.888	0.205	0.199	0.187	0.505	0.515	0.555	0.179	0.18	0.177	0.481	0.491	0.51	0.094	0.109	0.112	0.086	0.106	0.099
	24	0.208	0.2	0.201	0.813	0.923	0.899	0.167	0.155	0.152	0.632	0.689	0.717	0.159	0.169	0.152	0.731	0.81	0.777	0.126	0.129	0.1	0.126	0.124	0.117
Supplementary Fig. 5b	Cell viability of thyA-deficient strain with PcepA-sgRNA1 in defined minimal medium (DMM) with different carbon sources with or without thymidine. (CFU/mL)
	Hour	0.5% glucose, thymidine-			0.5% glucose, thymidine+			0.5% galactose, thymidine-			0.5% galactose, thymidine+			0.3% maltose, thymidine-			0.3% maltose, thymidine+			0.5% starch, thymidine-			0.5% starch, thymidine+
	0	3000000	3000000	3000000	3000000	3000000	3000000	3000000	3000000	3000000	3000000	3000000	3000000	3000000	3000000	3000000	3000000	3000000	3000000	3000000	3000000	3000000	3000000	3000000	3000000
	24	400	200	400	1080000000	1260000000	940000000	600000	400000	200000	1360000000	1080000000	1120000000	1200	1600	1200	1080000000	1020000000	920000000	3600000	2400000	3000000	66000000	86000000	60000000
	48	N.D.	N.D.	N.D.	200000000	180000000	140000000	60000	40000	40000	900000000	1100000000	900000000	N.D.	N.D.	N.D.	240000000	180000000	220000000	160000	80000	60000	44000000	50000000	56000000
	96	N.D.	N.D.	N.D.	20000000	22000000	18000000	N.D.	N.D.	N.D.	50000000	60000000	62000000	N.D.	N.D.	N.D.	28000000	22000000	24000000	10000	14000	16000	30000000	22000000	24000000
																							N.D. represents no detection.
Supplementary Fig. 5c	Cell viability of the engineered bacterial strain with or without thymidine under the condition of carbon starvation. (CFU/mL)
	Hour	w/o thymidine			w thymidine
	48	10000000	7800000	8600000	84000000	104000000	98000000
	96	600000	800000	1000000	3000000	3400000	2600000
Supplementary Fig. 5d	Growth curves of thyA-deficient strain with PcepA-sgRNA1 in TYG medium with bile acids (62.5 uM DCA; 0.5% crude ox bile extracts) with or without thymidine. (OD600)
	Hour	Bile acids-, thymidine+			DCA, thymidine-			DCA, thymidine+			Crude bile salts, thymidine-			Crude bile salts, thymidine+
	1	0.121	0.119	0.122	0.084	0.098	0.102	0.084	0.096	0.101	0.13	0.121	0.111	0.131	0.154	0.129
	2	0.14	0.12	0.133	0.109	0.111	0.123	0.156	0.167	0.171	0.151	0.161	0.143	0.151	0.163	0.171
	4	0.222	0.199	0.231	0.186	0.191	0.188	0.267	0.256	0.289	0.185	0.178	0.192	0.256	0.278	0.298
	6	0.342	0.321	0.299	0.234	0.221	0.198	0.389	0.378	0.401	0.255	0.231	0.198	0.337	0.327	0.398
	8	0.61	0.557	0.611	0.218	0.195	0.212	0.467	0.503	0.478	0.22	0.196	0.201	0.435	0.452	0.467
	10	0.482	0.578	0.619	0.209	0.199	0.201	0.663	0.678	0.71	0.219	0.213	0.221	0.65	0.667	0.698
	24	0.961	0.936	0.945	0.169	0.179	0.191	0.88	0.921	0.94	0.4	0.345	0.311	0.96	0.921	0.98
Supplementary Fig. 5e	Cell viability of thyA-deficient strain with PcepA-sgRNA1 in TYG medium with bile acids (62.5 uM DCA; 0.5% crude ox bile extracts) with or without thymidine. (CFU/mL)
	Hour	w/o thymidine, DCA			w/o thymidine, Crude bile salts			w thymidine, Bile acids-			w thymidine, DCA			w thymidine, Crude bile salts
	24	3400	1800	2400	200	200	200	780000000	900000000	1100000000	3000000000	4200000000	2400000000	1000000000	920000000	1040000000
	48	N.D.	N.D.	N.D.	N.D.	N.D.	N.D.	680000000	580000000	840000000	720000000	580000000	540000000	640000000	460000000	580000000
														N.D. represents no detection.

[truncated: 5 more sheets: Supplementary Fig. 6, Supplementary Fig. 8, Supplementary Fig. 9, Supplementary Fig. 10, Supplementary Fig. 11]
